# Supplementary material
Source: PubMed Central journal article supplement (PMC11027645)
Supplement: 262_2020_2530_MOESM1_ESM.pdf [file 262_2020_2530_MOESM1_ESM.pdf]

Table 1 (supplementary): differential expressed IC in ccRCC

| X         | baseMean | log2FoldChange | lfcSE | stat   | pvalue    | padj      |
|-----------|----------|----------------|-------|--------|-----------|-----------|
| CD70      | 2464,64  | 7,16           | 0,33  | 21,74  | 7,95E-105 | 4,05E-102 |
| ILT2      | 588,19   | 2,97           | 0,16  | 18,83  | 3,93E-79  | 6,11E-77  |
| CD40      | 2304,35  | 1,88           | 0,10  | 18,37  | 2,25E-75  | 2,84E-73  |
| OX40      | 274,55   | 3,02           | 0,17  | 17,92  | 7,72E-72  | 8,33E-70  |
| HVEM      | 4188,37  | 1,66           | 0,09  | 17,54  | 7,26E-69  | 6,89E-67  |
| 4-1BB     | 378,36   | 4,29           | 0,24  | 17,52  | 1,08E-68  | 1,01E-66  |
| CD200     | 1901,29  | 1,84           | 0,11  | 16,67  | 2,18E-62  | 1,49E-60  |
| HLA-G     | 1537,52  | 3,97           | 0,24  | 16,65  | 2,97E-62  | 2,01E-60  |
| B7-H4     | 1622,03  | -4,87          | 0,29  | -16,64 | 3,48E-62  | 2,36E-60  |
| Galectin9 | 2088,86  | 2,21           | 0,14  | 16,33  | 5,81E-60  | 3,57E-58  |
| 4-1BBL    | 390,44   | 3,66           | 0,23  | 15,97  | 1,97E-57  | 1,05E-55  |
| CD39      | 4650,97  | 0,99           | 0,07  | 14,96  | 1,43E-50  | 5,47E-49  |
| ILT4      | 560,97   | 2,21           | 0,15  | 14,83  | 9,46E-50  | 3,46E-48  |
| B7-H3     | 3453,01  | 1,23           | 0,08  | 14,61  | 2,47E-48  | 8,38E-47  |
| LAG3      | 405,28   | 3,66           | 0,26  | 14,16  | 1,54E-45  | 4,51E-44  |
| B7-H5     | 4082,56  | 1,32           | 0,09  | 13,87  | 9,85E-44  | 2,60E-42  |
| CD244     | 116,30   | 2,36           | 0,18  | 13,46  | 2,71E-41  | 6,34E-40  |
| MHC-II    | 37011,58 | 1,79           | 0,13  | 13,39  | 7,18E-41  | 1,64E-39  |
| CD27      | 356,17   | 3,32           | 0,25  | 13,29  | 2,81E-40  | 6,23E-39  |
| CD86      | 814,05   | 2,39           | 0,18  | 13,04  | 6,83E-39  | 1,42E-37  |
| PD-1      | 172,62   | 3,19           | 0,25  | 12,76  | 2,72E-37  | 5,22E-36  |
| ICOs      | 58,41    | 3,23           | 0,27  | 11,97  | 5,10E-33  | 7,84E-32  |
| CD80      | 37,03    | 2,40           | 0,20  | 11,91  | 1,07E-32  | 1,62E-31  |
| GITR      | 46,43    | 2,60           | 0,22  | 11,82  | 3,23E-32  | 4,74E-31  |
| CD160     | 48,24    | 1,60           | 0,14  | 11,65  | 2,17E-31  | 3,03E-30  |
| CD200R    | 174,61   | 2,40           | 0,21  | 11,52  | 1,10E-30  | 1,48E-29  |
| CTLA-4    | 57,77    | 2,75           | 0,24  | 11,36  | 6,50E-30  | 8,43E-29  |
| Kir2DL    | 8,52     | 2,57           | 0,24  | 10,53  | 6,22E-26  | 6,44E-25  |
| CD38      | 376,18   | 1,92           | 0,19  | 10,19  | 2,14E-24  | 2,04E-23  |
| CD48      | 1004,59  | 2,02           | 0,21  | 9,68   | 3,65E-22  | 3,04E-21  |
| PDL2      | 257,56   | 1,25           | 0,13  | 9,54   | 1,44E-21  | 1,16E-20  |
| OX40L     | 243,84   | 0,89           | 0,11  | 8,31   | 9,34E-17  | 5,64E-16  |
| VHL       | 1525,31  | -0,62          | 0,08  | -7,97  | 1,54E-15  | 8,58E-15  |
| CD28      | 233,00   | 1,49           | 0,19  | 7,93   | 2,25E-15  | 1,24E-14  |
| TIM-3     | 3686,16  | 1,91           | 0,24  | 7,90   | 2,72E-15  | 1,49E-14  |
| Bap1      | 4258,35  | -0,45          | 0,06  | -7,50  | 6,50E-14  | 3,25E-13  |
| CD40L     | 82,55    | 1,53           | 0,22  | 7,12   | 1,08E-12  | 4,99E-12  |
| S100A8    | 432,27   | 1,43           | 0,20  | 7,10   | 1,22E-12  | 5,62E-12  |
| BTLA      | 53,07    | 1,45           | 0,21  | 6,80   | 1,02E-11  | 4,39E-11  |
| CD203a    | 1110,10  | -0,99          | 0,15  | -6,45  | 1,11E-10  | 4,40E-10  |
| S100A9    | 1091,46  | 1,16           | 0,19  | 5,99   | 2,07E-09  | 7,49E-09  |
| PBRM1     | 2622,04  | -0,41          | 0,08  | -5,25  | 1,49E-07  | 4,62E-07  |
| PDL1      | 377,62   | 0,58           | 0,12  | 4,95   | 7,26E-07  | 2,10E-06  |
| ADOR      | 725,90   | -0,77          | 0,23  | -3,42  | 6,30E-04  | 1,32E-03  |
| CD73      | 2137,36  | 0,54           | 0,18  | 3,04   | 2,36E-03  | 4,57E-03  |
| GITRL     | 35,42    | 0,38           | 0,18  | 2,08   | 3,72E-02  | 5,87E-02  |
| IcosL     | 132,13   | -0,34          | 0,20  | -1,71  | 8,77E-02  | 1,28E-01  |
| CD157     | 619,91   | -0,01          | 0,15  | -0,06  | 9,51E-01  | 9,63E-01  |

BaseMean represents the mean of normalized counts for all samples, log2FoldChange represents the logarithm of the ratio of gene expression between the control and the patient, lfcSE represents the standard error of logarithm of fold change, stat represents the value of the test statistic, pvalue is the p-value of the test and padj, the adjusted p-value of the test.
